# Supplementary material
Source: PubMed Central journal article supplement (PMC4184922)
Supplement: NIHMS604602-supplement-Suppl_Tables.pdf [file NIHMS604602-supplement-Suppl_Tables.pdf]

| Upregulated High-Ribo |        | BY4741 |      | EY0690 |      | Upregulated Low-Ribo |       | BY4741 |      | EY0690 |      | Upregulated     |       | BY4741 |      | EY0690 |      |
|-----------------------|--------|--------|------|--------|------|----------------------|-------|--------|------|--------|------|-----------------|-------|--------|------|--------|------|
| Systematic Name       | Name   | mRNA   | Ribo | mRNA   | Ribo | Systematic Name      | Name  | mRNA   | Ribo | mRNA   | Ribo | Systematic Name | Name  | mRNA   | Ribo | mRNA   | Ribo |
| YER067W               | RG11   | 6.7    | 0.6  | 4.6    | -0.3 | YKL217W              | JEN1  | 6.0    | -1.6 | 5.6    | -1.5 | YLR149C         |       | 3.8    | -0.8 | 3.5    | -1.2 |
| YLR327C               | TMA10  | 5.9    | 2.9  | 6.0    | 0.9  | YFR015C              | GSY1  | 6.0    | -1.7 | 3.7    | -2.6 | YDR516C         | EMI2  | 3.6    | -0.3 | 2.7    | 0.1  |
| YCR021C               | HSP30  | 5.9    | 2.5  | 6.9    | 0.8  | YDR171W              | HSP42 | 5.8    | -2.0 | 4.7    | -1.5 | YGR043C         | NQM1  | 3.6    | -0.5 |        |      |
| YDR277C               | MTH1   | 5.1    | 1.3  | 3.6    | -0.7 | YFR053C              | HXK1  | 5.5    | -1.9 | 3.5    | -1.3 | YDL048C         | STP4  | 3.6    | -0.4 | 1.8    | -1.5 |
| YGR142W               | BTN2   | 5.0    | 2.0  | 5.2    | 0.6  | YEL011W              | GLC3  | 5.5    | -1.8 | 5.0    | -2.7 | YLR142W         | PUT1  | 3.5    | -0.4 | 3.2    | 0.1  |
| YHR087W               | RTC3   | 5.0    | 0.8  | 4.4    | 0.7  | YGR249W              | MGA1  | 5.1    | -1.8 | 5.4    | -2.2 | YCL042W         | Vnx1  | 3.2    | -0.9 | 2.4    | -1.2 |
| YKR075C               |        | 4.6    | 1.3  | 4.4    | -0.4 | YDR342C              | HXT6  | 4.2    | -1.4 | 3.2    | -0.1 | YNL077W         | APJ1  | 3.1    | -0.4 | 3.2    | -0.7 |
| YGR008C               | STF2   | 4.5    | 1.9  | 2.9    | 0.2  | YPR160W              | GPH1  | 4.2    | -1.8 | 3.6    | -2.0 | YBR214W         | SDS24 | 3.1    | 0.1  | 2.4    | -1.0 |
| YER150W               | SPI1   | 4.2    | 0.9  | 4.6    | 0.2  | YGL205W              | POX1  | 4.1    | -1.3 | 2.8    | -1.8 | YAL054C         | ACS1  | 3.0    | -0.1 | 1.7    | 1.2  |
| YOL052C-A             | DDR2   | 4.1    | 1.1  | 4.5    | -0.1 | YGR088W              | CTT1  | 3.9    | -1.0 | 4.4    | -1.2 | YML100W         | TSL1  | 2.9    | 0.0  | 2.2    | -1.1 |
| YBR072W               | HSP26  | 3.9    | 1.1  | 4.9    | 0.3  | YLR258W              | GSY2  | 3.3    | -1.1 | 1.4    | -1.1 | YCL040W         | GLK1  | 2.9    | -0.3 | 2.1    | -1.1 |
| YLL026W               | HSP104 | 3.8    | 0.7  | 3.1    | 0.3  | YMR303C              | ADH2  | 3.0    | -1.1 | 0.3    | 0.7  | YOR019W         |       | 2.9    | -0.7 | 3.0    | -0.2 |
| YHL021C               |        | 3.7    | 1.3  | 3.7    | -0.1 | YJL052W              | TDH1  | 2.9    | -1.5 | 2.7    | -1.3 | YBR169C         | Rrp43 | 2.9    | -0.9 | 3.1    | -1.5 |
| YGR243W               | FMP43  | 3.7    | 2.2  | 3.0    | 0.7  | YDL021W              | GPM2  | 2.9    | -1.6 | 2.2    | 0.7  | YMR011W         | HXT2  | 2.7    | 0.0  | 3.9    | 0.2  |
| YDR258C               | HSP78  | 3.5    | 0.3  | 2.6    | -0.2 | YDR453C              | TSA2  | 2.8    | -1.9 | 2.9    | 0.3  | YMR250W         | Tdp1  | 2.7    | -0.9 | 2.2    | -2.5 |
| YJL144W               |        | 3.5    | 3.2  | 5.2    | -0.4 | YOL032W              | OPI10 | 2.8    | -1.5 | 2.7    | -2.4 | YNL009W         | IDP3  | 2.6    | -0.5 |        |      |
| YGL255W               | ZRT1   | 3.3    | 0.1  | -0.9   | 0.0  | YHR092C              | HXT4  | 2.7    | -1.5 | 1.9    | -0.2 | YPL123C         | RNY1  | 2.6    | -0.5 | 1.6    | 0.5  |
| YGL037C               | PNC1   | 3.3    | 0.8  | 1.7    | 0.4  | YCR091W              | KIN82 | 2.6    | -2.1 | 2.9    | -1.9 | YPL186C         | UIP4  | 2.6    | -0.3 |        |      |
| YMR120C               | ADE17  | 3.3    | 0.1  | -0.9   | -0.1 | YBR147W              | RTC2  | 2.5    | -2.9 | 3.0    | -2.6 | YIL101C         | XBP1  | 2.5    | -0.4 | 2.2    | -0.5 |
| YMR105C               | PGM2   | 3.2    | 2.2  | 3.2    | -0.9 |                      |       |        |      |        |      |                 |       |        |      |        |      |
| YKL086W               | SRX1   | 3.1    | 2.3  | 5.3    | 0.5  |                      |       |        |      |        |      |                 |       |        |      |        |      |
| YML128C               | MSC1   | 3.1    | 0.4  | 3.2    | -0.2 |                      |       |        |      |        |      |                 |       |        |      |        |      |
| YFL014W               | HSP12  | 3.1    | 0.8  | 2.6    | 0.9  |                      |       |        |      |        |      |                 |       |        |      |        |      |
| YKL109W               | HAP4   | 3.1    | 0.7  | 1.8    | -1.0 |                      |       |        |      |        |      |                 |       |        |      |        |      |
| YOR173W               | DCS2   | 3.0    | 0.6  | 3.3    | -1.6 |                      |       |        |      |        |      |                 |       |        |      |        |      |
| YMR104C               | YPK2   | 2.9    | 0.3  | 2.6    | -1.0 |                      |       |        |      |        |      |                 |       |        |      |        |      |
| YLR177W               |        | 2.8    | 0.7  | 2.9    | -1.5 |                      |       |        |      |        |      |                 |       |        |      |        |      |
| YER103W               | SSA4   | 2.8    | 1.1  | 4.9    | -0.3 |                      |       |        |      |        |      |                 |       |        |      |        |      |
| YPL240C               | HSP82  | 2.8    | 0.1  | 2.2    | 0.1  |                      |       |        |      |        |      |                 |       |        |      |        |      |
| YBL078C               | ATG8   | 2.8    | 0.8  | 2.2    | 1.1  |                      |       |        |      |        |      |                 |       |        |      |        |      |
| YHR097C               |        | 2.7    | 0.4  | 2.9    | -0.1 |                      |       |        |      |        |      |                 |       |        |      |        |      |
| YNR014W               |        | 2.7    | 1.3  | 2.4    | 0.1  |                      |       |        |      |        |      |                 |       |        |      |        |      |
| YMR280C               | CAT8   | 2.6    | 3.2  | 3.5    | -0.2 |                      |       |        |      |        |      |                 |       |        |      |        |      |

**SupplementaryTable 1 | mRNAs upregulated during glucose starvation have differences in ribosome occupancy.** Fold-change in mRNA levels and in ribosome occupancy after 15 minutes of glucose starvation from one measurement of BY4741 and one measurement of EY0690 on total non-polyA selected mRNA. mRNA upregulated, higher ribosome occupancy genes (mRNA>2.5, Ribo>0.09, pink), mRNA upregulated, lower ribosome occupancy genes (mRNA>2.5, Ribo<-1.0, blue), mRNA upregulated (mRNA>2.5, -1.0<Ribo<-0.09, white). mRNA upregulated, higher ribosome occupancy EY0690 (mRNA>2.5, Ribo>-0.5, pink), mRNA upregulated, lower ribosome occupancy EY0690 (mRNA>2.5, Ribo < -1.0, blue), mRNA upregulated (mRNA>2.5, -1<Ribo<-0.5, white) and not upregulated (T<2.5, grey). The cutoff for higher ribosome occupancy was set by the median ribosome occupancy of all genes (BY4741 = 0.09, EY0690 = -0.5). mRNA = log2 mRNA fold change for glucose starvation vs. log-phase glucose-rich. Ribo = log2 ribosome occupancy fold change for glucose starvation vs. log-phase glucose-rich.

| Strain Number   | Genotype                                                                                     |
|-----------------|----------------------------------------------------------------------------------------------|
| EY2536          | BY4741                                                                                       |
| EY0690          | W303                                                                                         |
| EY2888          | W303, <i>P<sub>MYO2</sub>-MS2-CP-GFP(3x)::HIS3, DCP2-mRFP1.3::KanMX6</i>                     |
| EY2889          | EY2888, <i>PUTR<sub>PGK1(-600-0)</sub>PGK1-MS2-ADH1_3'UTR::LEU2</i>                          |
| EY2890          | EY2888, <i>PUTR<sub>PDC1(-898-0)</sub>PDC1-MS2-ADH1_3'UTR::LEU2</i>                          |
| EY2891          | EY2888, <i>PUTR<sub>GLC3(-396-0)</sub>GLC3-MS2-ADH1_3'UTR::LEU2</i>                          |
| EY2892          | EY2888, <i>PUTR<sub>HXK1(-940-0)</sub>HXK1-MS2-ADH1_3'UTR::LEU2</i>                          |
| EY2893          | EY2888, <i>PUTR<sub>HSP26(-604-0)</sub>HSP26-MS2-ADH1_3'UTR::LEU2</i>                        |
| EY2894          | EY2888, <i>PUTR<sub>HSP30(-1010-0)</sub>HSP30-MS2-ADH1_3'UTR::LEU2</i>                       |
| EY2895          | EY2888, <i>PUTR<sub>PGK1(-600-0)</sub>PGK1-MS2-ADH1_3'UTR::LEU2, PAB1-CFP::URA3</i>          |
| EY2896          | EY2888, <i>PUTR<sub>GLC3(-396-0)</sub>GLC3-MS2-ADH1_3'UTR::LEU2, PAB1-CFP::URA3</i>          |
| EY2897          | EY2888, <i>P<sub>TetO7-lacZ</sub>-MS2-ADH1_3'UTR::LEU2, P<sub>ERV14-rtTA(S2)</sub>::URA3</i> |
| EY2898          | EY2888, <i>PUTR<sub>HSP30(-1010-0)</sub>CFP-MS2-ADH1_3'UTR::LEU2</i>                         |
| EY2899          | EY2888, <i>PUTR<sub>HSP26(-604-0)</sub>CFP-MS2-ADH1_3'UTR::LEU2</i>                          |
| EY2900          | EY2888, <i>PUTR<sub>GLC3(-396-0)</sub>CFP-MS2-ADH1_3'UTR::LEU2</i>                           |
| EY2901          | EY2888, <i>PUTR<sub>HXK1(-940-0)</sub>CFP-MS2-ADH1_3'UTR::LEU2</i>                           |
| EY2902          | EY2888, <i>P<sub>HSP26(-604--39)</sub>UTR<sub>GLC3(-32-0)</sub>CFP-MS2-ADH1_3'UTR::LEU2</i>  |
| EY2903          | EY2888, <i>P<sub>GLC3(-396--32)</sub>UTR<sub>HSP26(-39-0)</sub>CFP-MS2-ADH1_3'UTR::LEU2</i>  |
| EY2904          | EY2888, <i>P<sub>HXK1(-940--105)</sub>UTR<sub>HSP26(-39-0)</sub>CFP-MS2-ADH1_3'UTR::LEU2</i> |
| EY2905          | EY2888, <i>Chim1PUTR<sub>HSP26(-694--448)</sub>GLC3(-263-0)CFP-MS2-ADH1_3'UTR::LEU2</i>      |
| EY2906          | EY2888, <i>Chim2PUTR<sub>HSP26(-694--317)</sub>GLC3(-202-0)CFP-MS2-ADH1_3'UTR::LEU2</i>      |
| EY2907          | EY2888, <i>Chim3PUTR<sub>GLC3(-397--245)</sub>HSP26(-407-0)CFP-MS2-ADH1_3'UTR::LEU2</i>      |
| EY2908          | EY2888, <i>Chim4PUTR<sub>GLC3(-397--202)</sub>HSP26(-316-0)CFP-MS2-ADH1_3'UTR::LEU2</i>      |
| EY2909          | EY2888, <i>P<sub>STRE</sub>CFP-MS2-ADH1_3'UTR::LEU2</i>                                      |
| EY2910          | EY2888, <i>P<sub>STRE+HSE</sub>CFP-MS2-ADH1_3'UTR::LEU2</i>                                  |
| Open Biosystems | BY4741, <i>HSP30::TAP::HIS3</i>                                                              |
| Open Biosystems | BY4741, <i>HSP26::TAP::HIS3</i>                                                              |
| Open Biosystems | BY4741, <i>GLC3::TAP::HIS3</i>                                                               |
| Open Biosystems | BY4741, <i>GSY1::TAP::HIS3</i>                                                               |
| Open Biosystems | BY4741, <i>RPB3::TAP::HIS3</i>                                                               |

**Supplementary Table 2 | Yeast strains used in this study**

| Primer          | Sequence                                                                                                               |
|-----------------|------------------------------------------------------------------------------------------------------------------------|
| <i>ACT1_F</i>   | CTGCCGGTATTGACCAAACCT                                                                                                  |
| <i>ACT1_R</i>   | CGGTGATTTTCCTTTTGCATT                                                                                                  |
| <i>PGK1_F</i>   | GGACAAGCGTGTCTTCATCA                                                                                                   |
| <i>PGK1_R</i>   | CGTTTCTTTCACCGTTTGGT                                                                                                   |
| <i>PDC1_F</i>   | GGCAATACCGTTCAAAGCAG                                                                                                   |
| <i>PDC1_R</i>   | CTTACGCCGCTGATGGTTAC                                                                                                   |
| <i>CDC19_F</i>  | CACCACCGATGACAAGTACG                                                                                                   |
| <i>CDC19_R</i>  | CTTGTCGTCAACGACTTCCA                                                                                                   |
| <i>PGII_F</i>   | ACAACCACTTCACCCAAACC                                                                                                   |
| <i>PGII_R</i>   | TTGCAAGTAGGCTGGGAATC                                                                                                   |
| <i>HSP30_F</i>  | CAATCCGGAACCAAAGAAA                                                                                                    |
| <i>HSP30_R</i>  | CGAAATCGCCGTTAGGTAAG                                                                                                   |
| <i>HSP26_F</i>  | AAGGCGGCTTAAGAGGCTAC                                                                                                   |
| <i>HSP26_R</i>  | ATCATAAAGAGCGCCAGCAT                                                                                                   |
| <i>HSP104_F</i> | CGACGCTGCTAACATCTTGA                                                                                                   |
| <i>HSP104_R</i> | CACTTGGTTCAGCGACTTCA                                                                                                   |
| <i>HSP12_F</i>  | CGAAAAAGGCAAGGATAACG                                                                                                   |
| <i>HSP12_R</i>  | TTGGTTGGGTCTTCTTCACC                                                                                                   |
| <i>GLC3_F</i>   | CAATCCGGAACCAAAGAAA                                                                                                    |
| <i>GLC3_R</i>   | CGAAATCGCCGTTAGGTAAG                                                                                                   |
| <i>GSY1_F</i>   | GCCGCTGGTGTAGTAGATTT                                                                                                   |
| <i>GSY1_R</i>   | GCAGTGATTTGCGACACAGT                                                                                                   |
| <i>HXK1_F</i>   | GTACCCAGCTTCCCAAACA                                                                                                    |
| <i>HXK1_R</i>   | TTTGTAGCAATGGGACGACA                                                                                                   |
| <i>GPH1_F</i>   | TTCCCAAGAAATCAAGTCAA                                                                                                   |
| <i>GPH1_R</i>   | TCATAAGCAGCCATGTCATCA                                                                                                  |
| Telomeric_F     | CCCAGGTACGAAACGCTAAG                                                                                                   |
| Telomeric_R     | ATAAGGTTGTCGACGGTTGC                                                                                                   |
| <i>CFP_F</i>    | GGTCACAAGTTCTCTGTTTCTG                                                                                                 |
| <i>CFP_R</i>    | CCAAGTCAAAGTAGTAACCAAAG                                                                                                |
| oTi225          | pGATCGTCGGACTGTAGAACTCTGAACCTGTCGGTGGTCGCCGTATCATT/Sp18/CACT<br>CA/Sp18/CAAGCAGAAGACGGCATAACGATTTTTTTTTTTTTTTTTTTTTVN  |
| oTi9pA          | pAGATCGGAAGAGCGTCGTGTAGGGAAAGAGTGTAGATCTCGGTGGTCGC/Sp18/CA<br>CTCA/Sp18/TTCAGACGTGTGCTCTTCCGATCTTTTTTTTTTTTTTTTTTTTTVN |

**Supplementary Table 3 | List of primers used for RT-qPCR, CHIP-qPCR and Ribosome profiling.** ‘p’ designates 5’ phosphorylation, ‘Sp18’ designates a hexa-ethyleneglycol spacer, and ‘V’, ‘N’ indicate degenerate nucleotides.
